# Supplementary material
Source: publisher site journal article supplement (https://www.dovepress.com/get_supplementary_file.php?f=252410.docx)
Supplement: Supplementary file 1 [file get_supplementary_file.php]

Supplementary Illustration 1: Illustration of study design


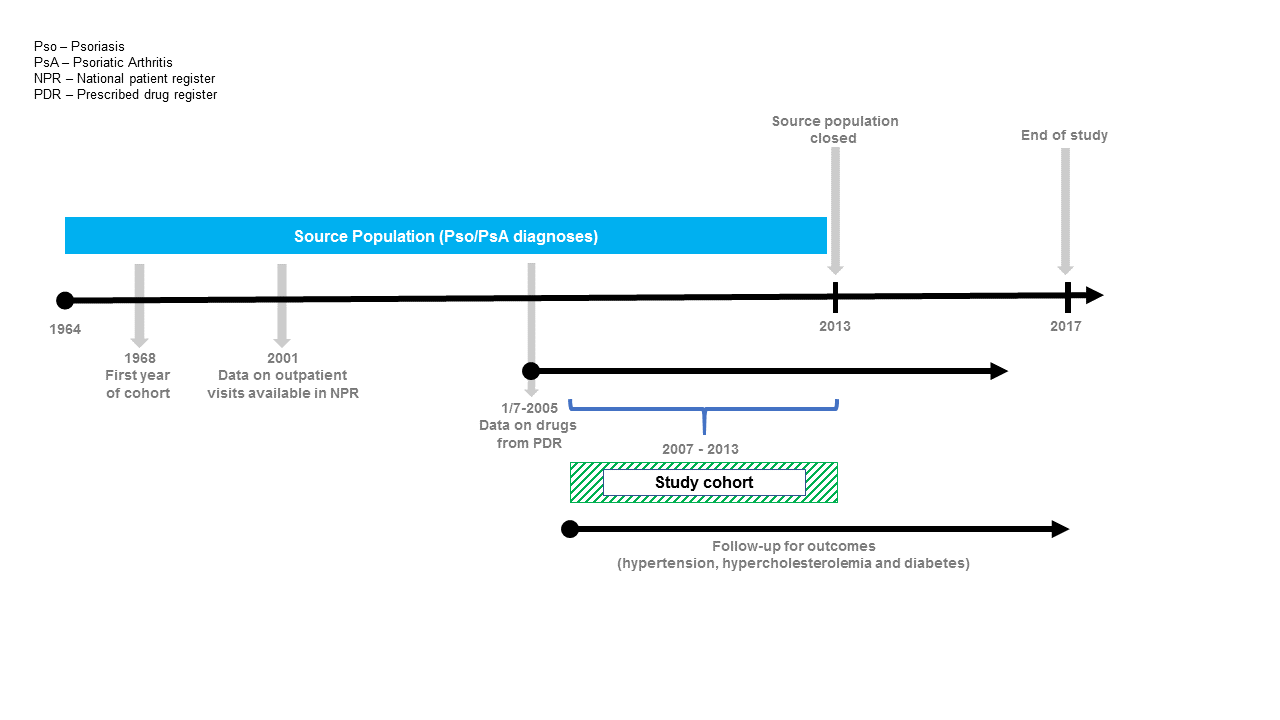


Supplementary Figure 1: Hazard Ratio (with 95% confidence interval) of hypertension among patients with mild psoriasis

*
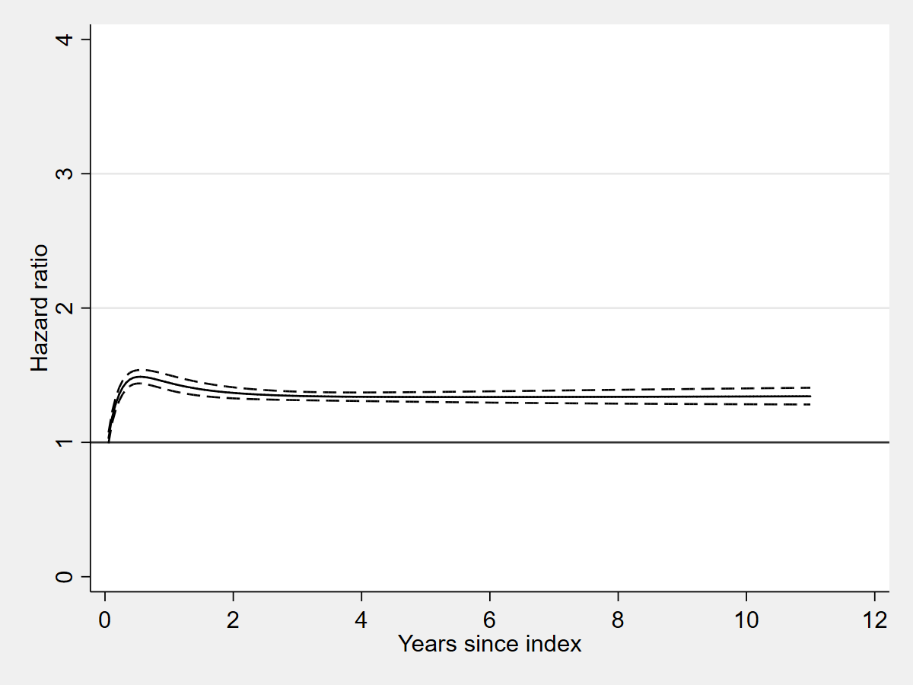
*

*Supplementary Figure 2: Hazard Ratio and 95% confidence interval of hypertension among patients with moderate psoriasis*


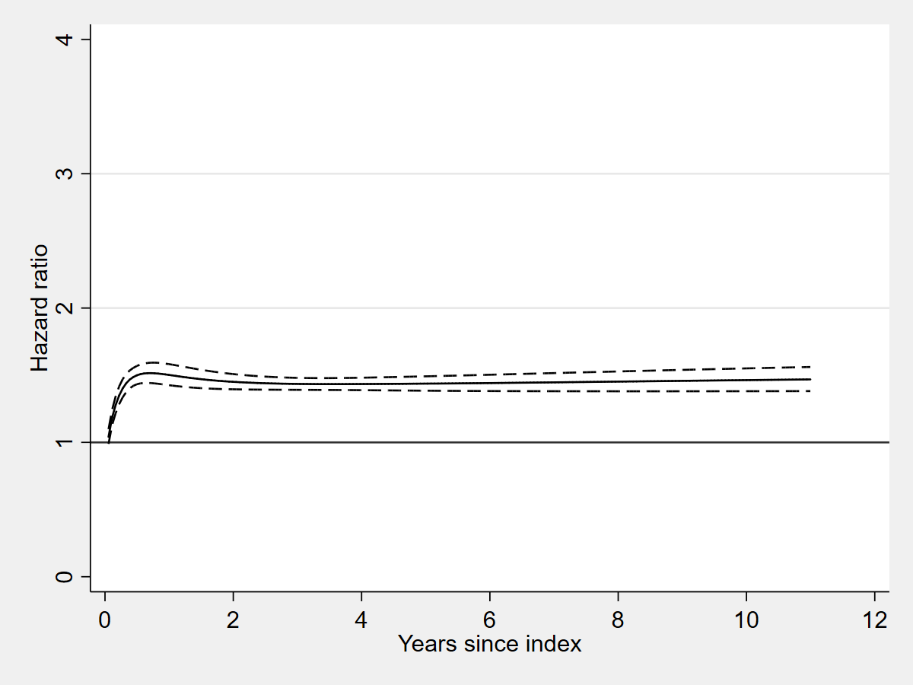


Supplementary Figure 3: Hazard Ratio and 95% confidence interval of hypertension among patients with severe psoriasis


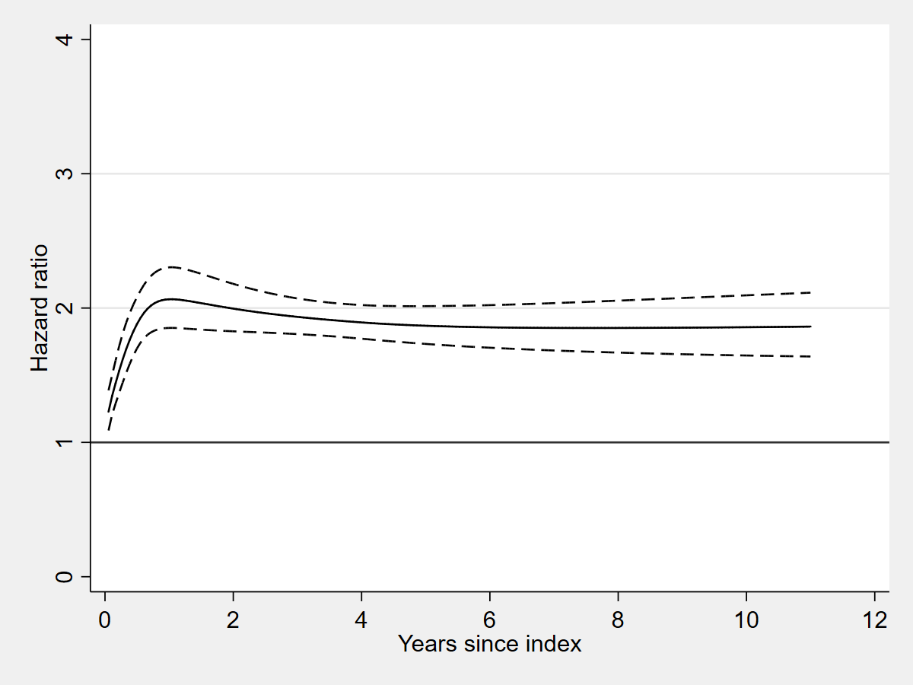


Supplementary Figure 4: Hazard Ratio and 95% confidence interval of hypercholesterolemia among patients with mild psoriasis


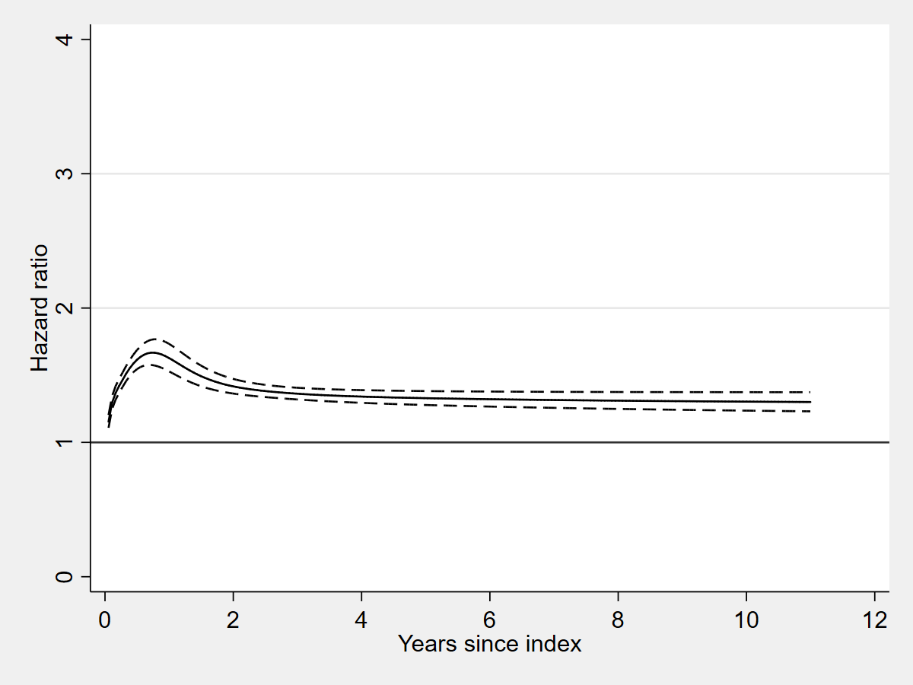


Supplementary Figure 5: Hazard Ratio and 95% confidence interval of hypercholesterolemia among patients with moderate psoriasis


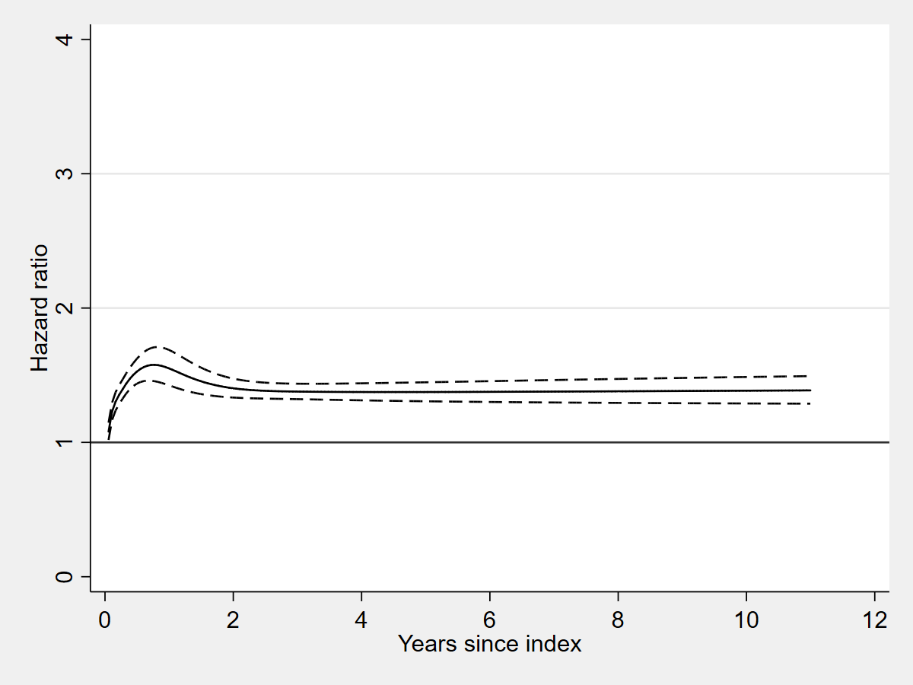


Supplementary Figure 6: Hazard Ratio and 95% confidence interval of hypercholesterolemia among patients with severe psoriasis


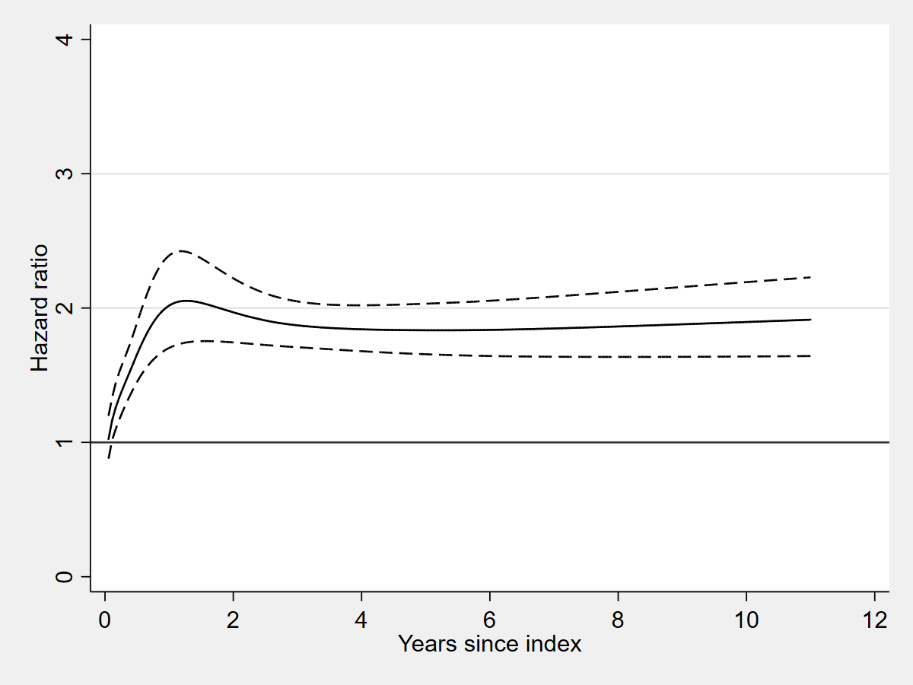


Supplementary Figure 7: Hazard Ratio and 95% confidence interval of diabetes among patients with mild psoriasis


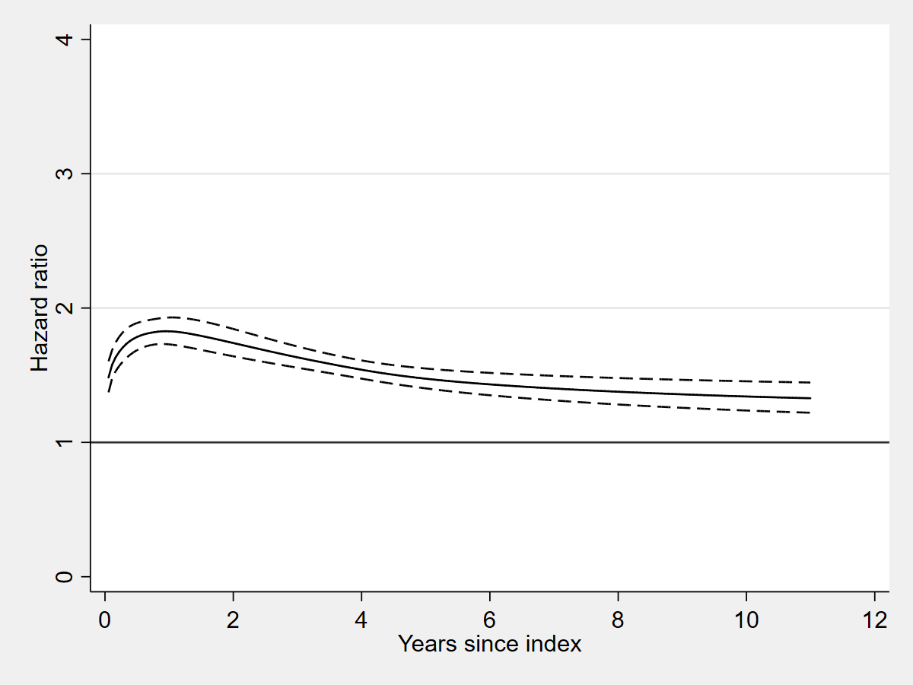


Supplementary Figure 8: Hazard Ratio and 95% confidence interval of diabetes among patients with moderate psoriasis


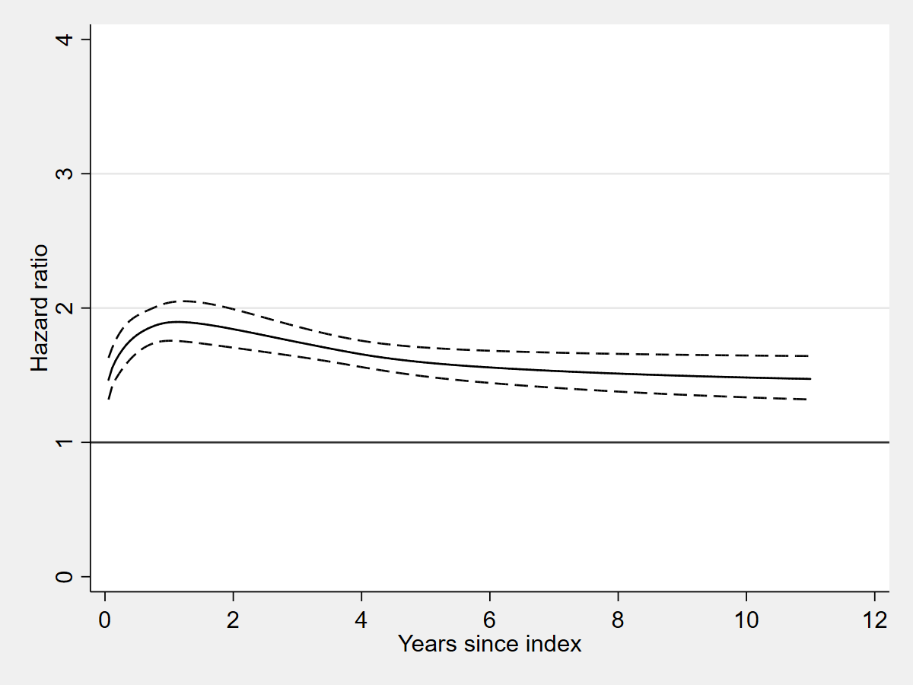


Supplementary Figure 9: Hazard Ratio and 95% confidence interval of diabetes among patients with severe psoriasis


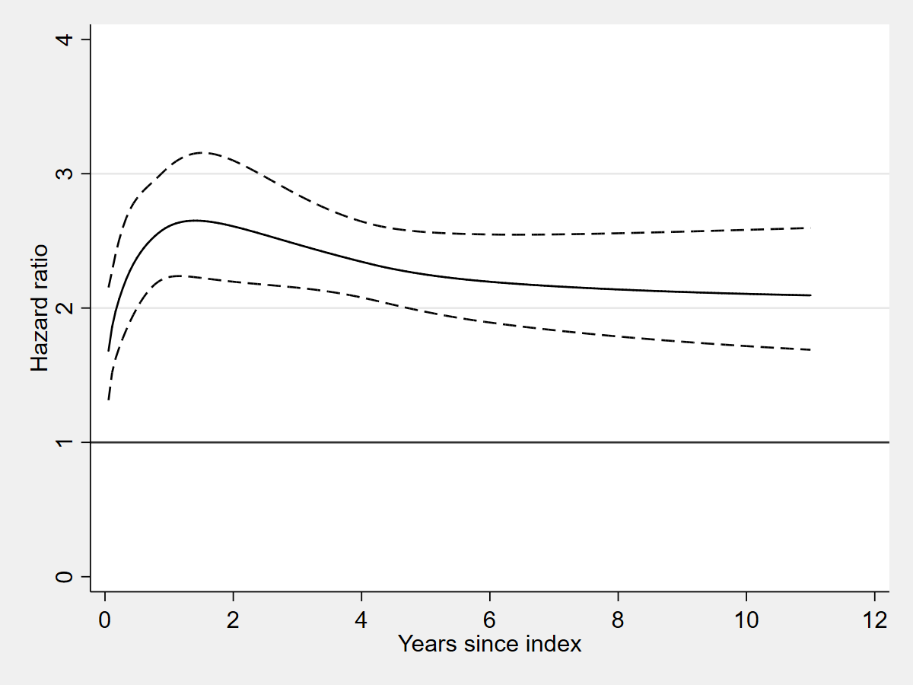


Supplementary Figure10: Predicted risk (with 95% confidence interval) of hypertension among patients with mild psoriasis and their matched controls
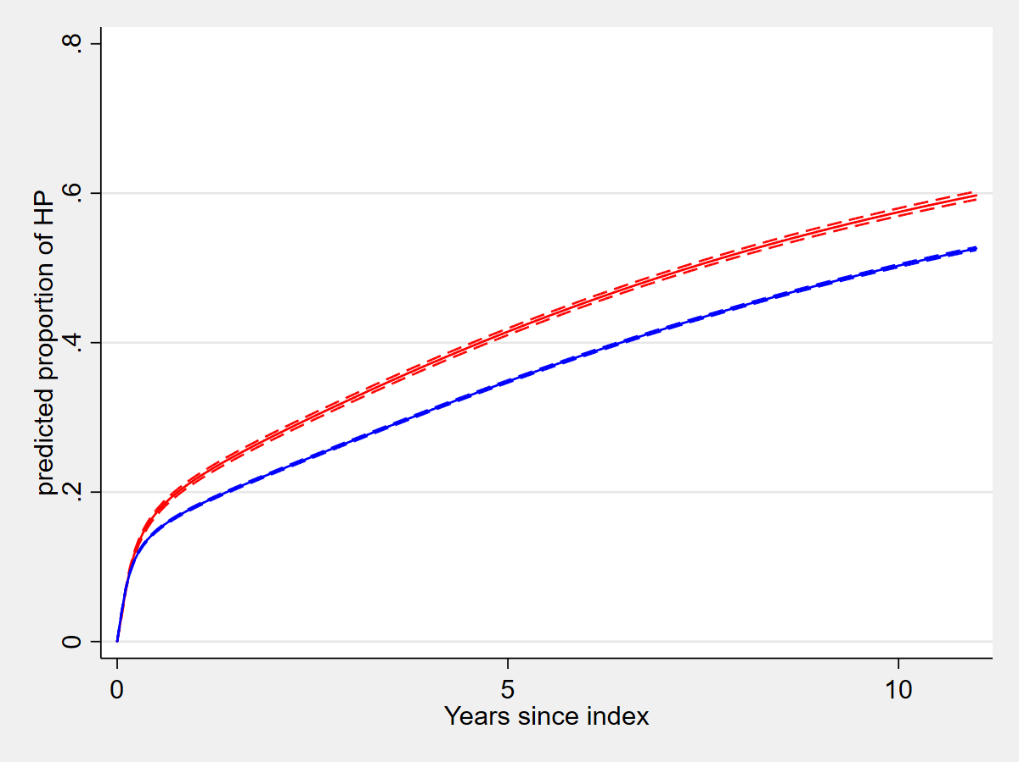


Survival probability of hypertension

Supplementary Figure 11: Predicted risk (with 95% confidence interval) of hypertension among patients with moderate psoriasis and their matched controls


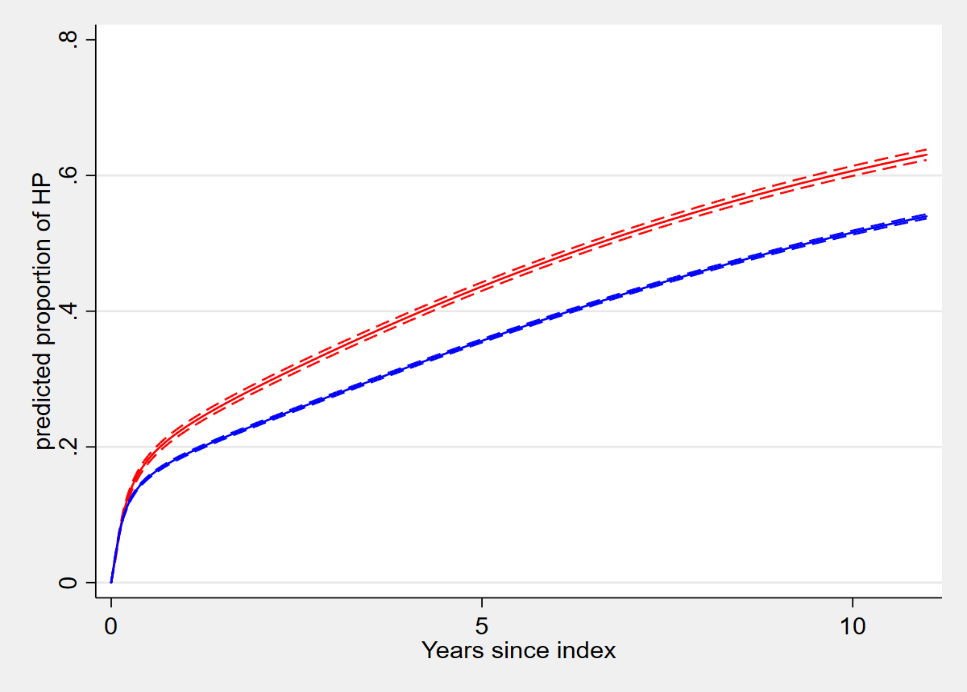


Survival probability of hypertension

Supplementary Figure 12: Predicted risk (with 95% confidence interval) of hypertension among patients with severe psoriasis and their matched controls


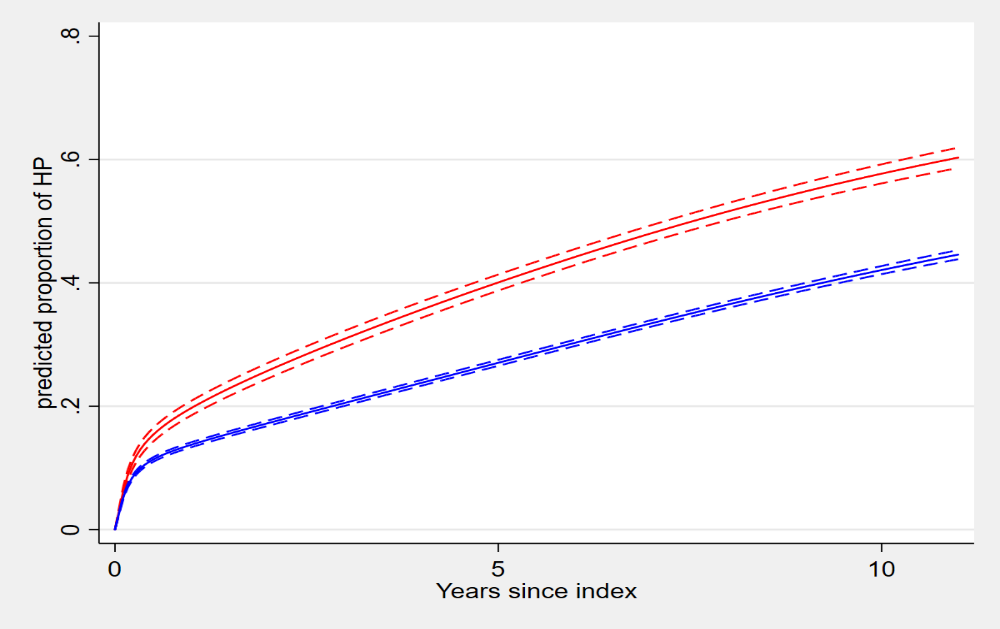


Survival probability of hypertension

Supplementary Figure 13: Predicted risk (with 95% confidence interval) of hypercholesterolemia among patients with mild psoriasis and their matched controls


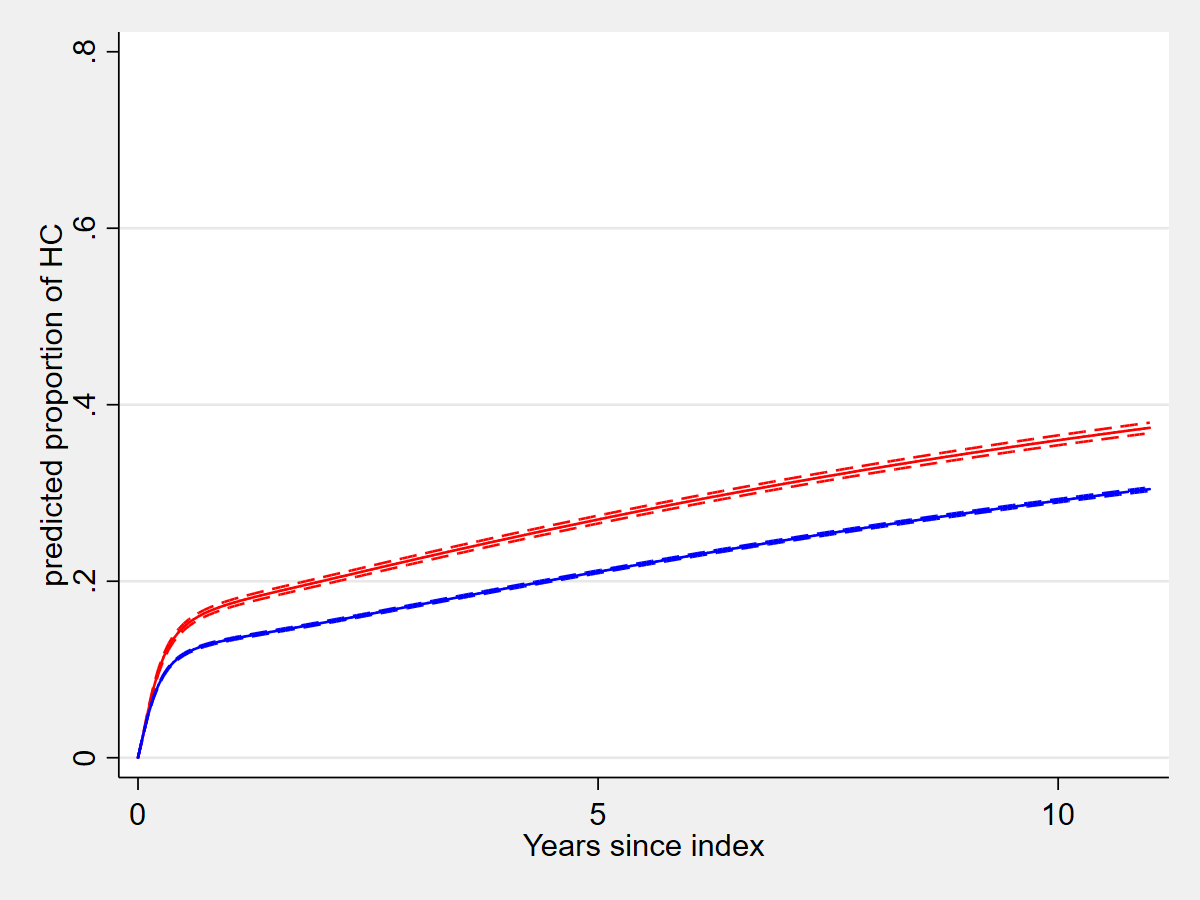


Survival probability of hypercholesterolemia

Supplementary Figure 14: Predicted risk (with 95% confidence interval) of hypercholesterolemia among patients with moderate psoriasis and their matched controls


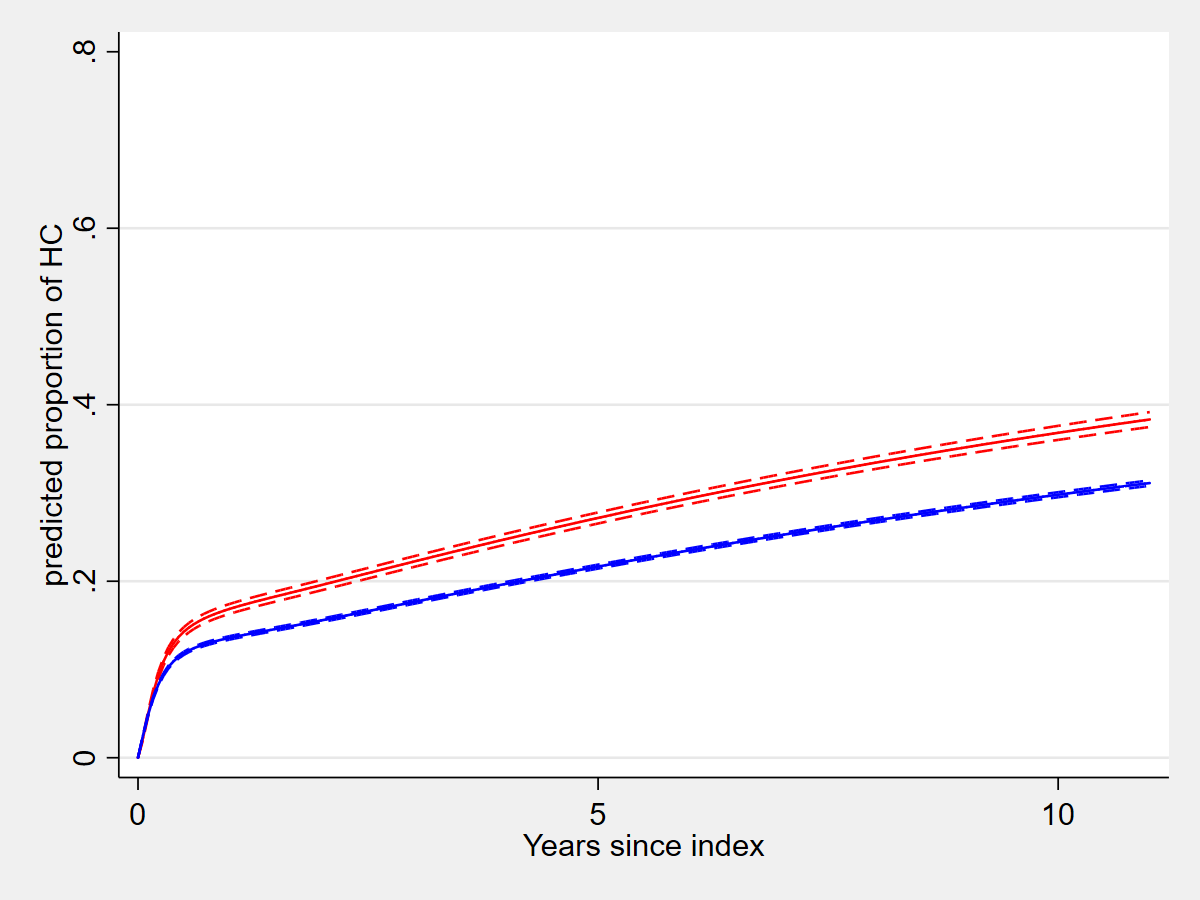


Survival probability of hypercholesterolemia

Supplementary Figure 15: Predicted risk (with 95% confidence interval) interval of hypercholesterolemia among patients with severe psoriasis and their matched controls


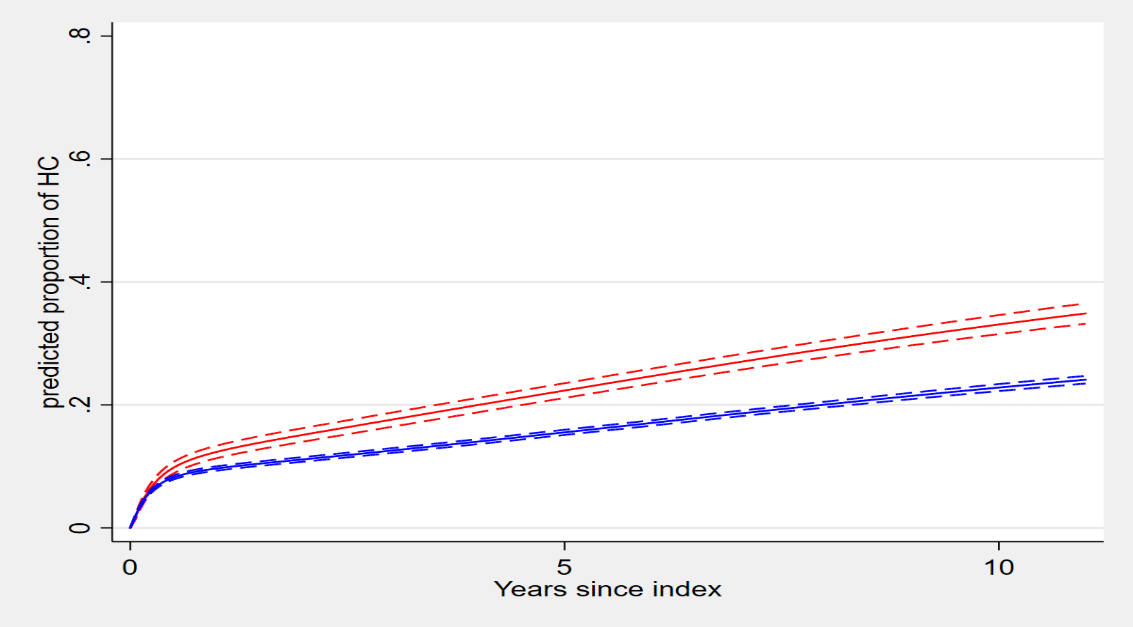


Survival probability of hypercholesterolemia

Supplementary Figure 16: Predicted risk (with 95% confidence interval) of diabetes among patients with mild psoriasis and their matched controls


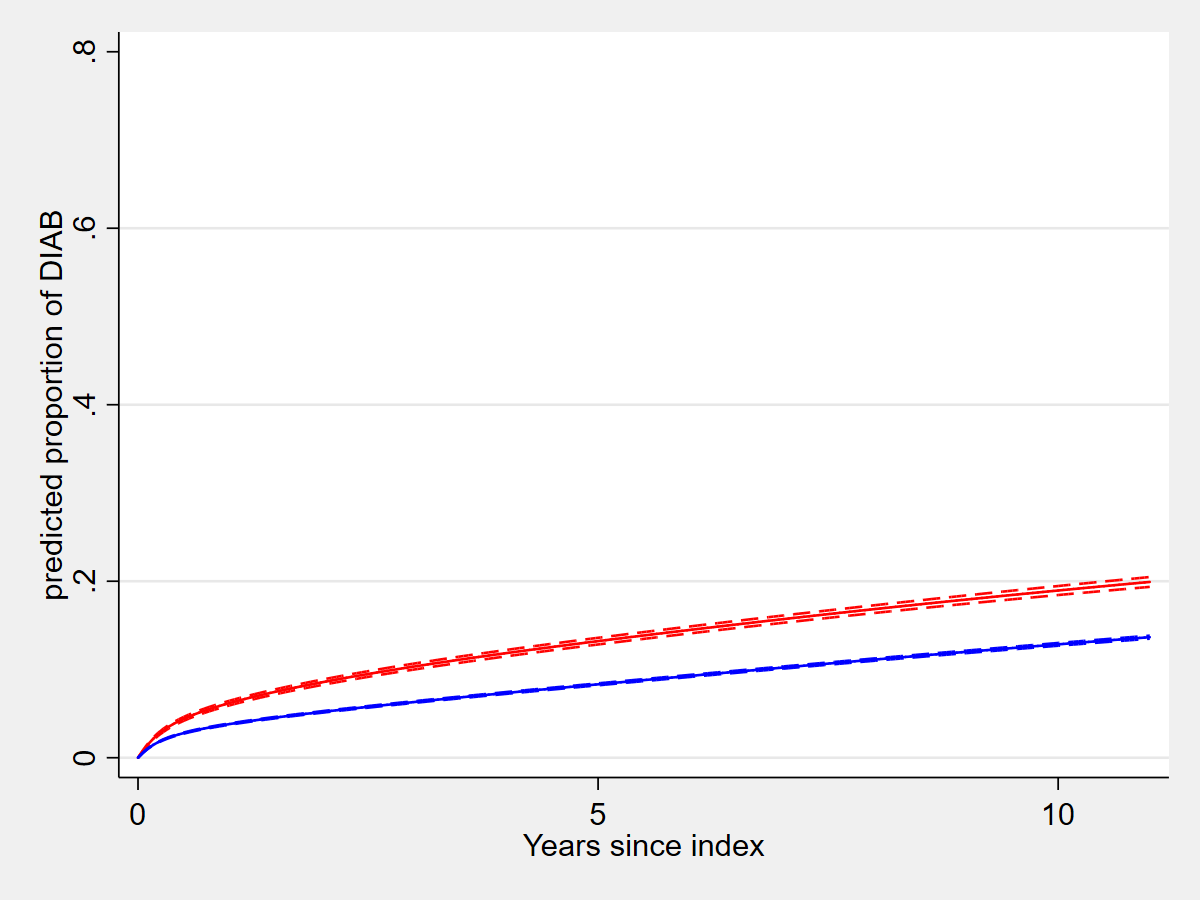


Survival probability of diabetes

Supplementary Figure 17: Predicted risk (with 95% confidence interval) of diabetes among patients with moderate psoriasis and their matched controls


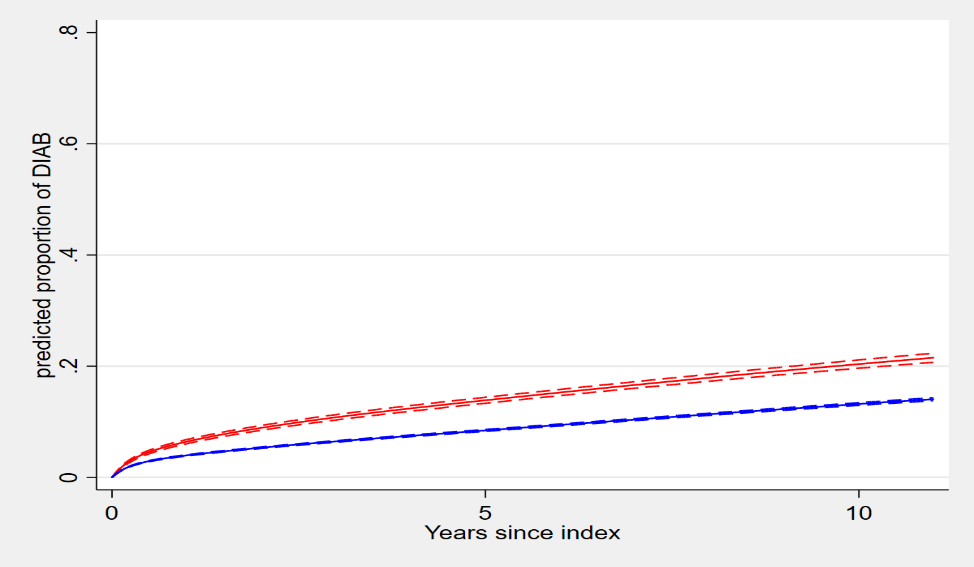


Survival probability of diabetes

Supplementary 18: Predicted risk (with 95% confidence interval) of diabetes among patients with severe psoriasis and their matched controls


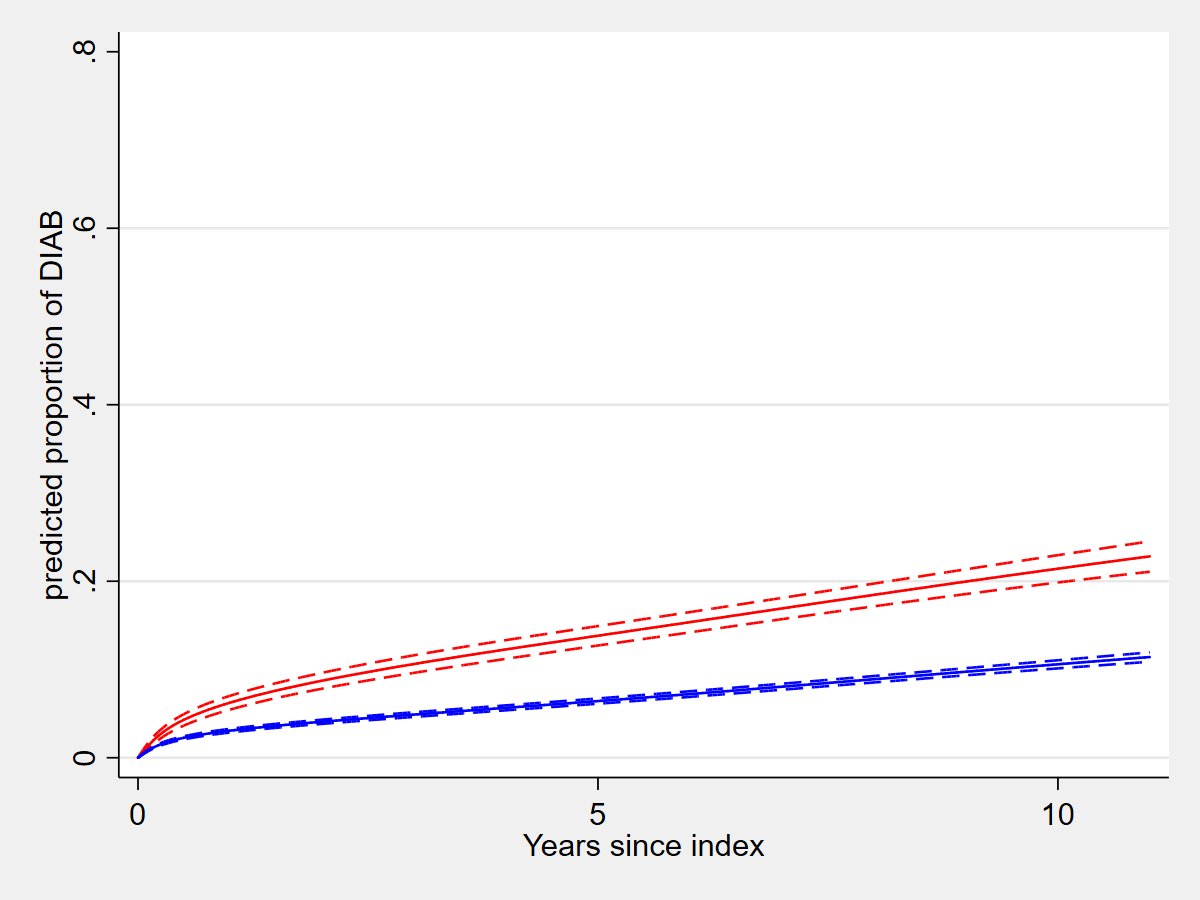


Survival probability of diabetes

| **Supplementary Table 1: ICD-10 and ATC codes used to define the outcomes** | | |
| --- | --- | --- |
| **Outcome** | **ICD-10** | **ATC** |
| Hypertension | I10 | C02, C07, C08, C09, C03A, C03B |
| Hypercholesterolemia | E780 | C10 |
| Diabetes | E10-E11 | A10A, A10B |
